# Supplementary material for: A novel fluorescent probe for the localization of nucleoli developedviaa chain reaction of endogenous cysteine in cells
Source: Royal Society of Chemistry journal article supplement (doi:10.1039/d0tb01366h), 2020-01-01
Supplement: d0tb01366h1.pdf [file d0tb01366h1.pdf]

1

## Supplementary Information

2 **A Novel Fluorescence Probe for Localization of Nucleoli Developed**

3 **via Chain Reaction of Endogenous Cysteine in Cells**

4 **Lihe Zhao,<sup>a</sup> Xu He,<sup>b</sup> Dan Li,<sup>a</sup> Shaomei Xu,<sup>a</sup> Yibing Huang,<sup>b</sup> Xiaolei Li,<sup>c</sup> Xinghua**

5 **Wang,<sup>a</sup> Ying Sun,<sup>a</sup> Pinyi Ma,<sup>\*a</sup> and Daqian Song,<sup>\*a</sup>**

6 *<sup>a</sup> College of Chemistry, Jilin University, Qianjin Street 2699, Changchun 130012,*

7 *China*

8 *<sup>b</sup> College of Life Sciences, Jilin University, Qianjin Street 2699, Changchun 130012,*

9 *China*

10 *<sup>c</sup> School of Chemistry and Chemical Engineering, Shandong Provincial Key Laboratory*

11 *of Chemical Energy Storage and Novel Cell Technology, Liaocheng University,*

12 *Liaocheng, 252059, China*

13 **\*Corresponding authors.**

14 E-mail: mapinyi@jlu.edu.cn (Pinyi Ma); songdq@jlu.edu.cn (Daqian Song)

15

## 16 **Experimental Section**

### 17 **Instrumentation and Reagents**

18 <sup>1</sup>H-NMR spectra were recorded on Avance III500 NMR spectrometer (Bruker  
19 Inc., Germany). Mass spectra (MS) were recorded on a MALDI-TOF-MS (Bruker Inc.,  
20 Germany). pH was measured on an INESA Scientific PHS-3C pH meter (Sartorius AG,  
21 Germany). Fluorescence spectra and Quantum Yield were recorded on an F-7000  
22 fluorescence spectrometer (Hitachi Co., Ltd. Japan) with a 1-cm quartz cell. Absorption  
23 spectra were recorded on a Cary 60 UV-spectrophotometer (Agilent Technologies,  
24 USA) with a 1-cm quartz cell. Cell imaging experiments were carried out on an LSM  
25 710 laser scanning confocal microscope (Carl Zeiss, Oberkochen, Germany).

26 Cysteine (Cys) was purchased from Shanghai Yuanye Bio-Technology Co., Ltd  
27 (China). 2-(2-Hydroxyphenyl)benzothiazole, 1,1,2-trimethyl-1H-benz[e]indole, and  
28 iodoethane were purchased from Sun Chemical Technology (Shanghai) Co., Ltd  
29 (China). Leucine (Leu), isoleucine (Ile), serine (Ser), threonine (Thr), threonine (Trp),  
30 tyrosine (Tyr), glycine (Gly), lysine (Lys), glutamic acid (Glu), phenylalanine (Phe),  
31 alanine (Ala), asparagine (Asn), histidine (His), valine (Val), arginine (Arg) were of  
32 analytical reagent grade and used without further purification or treatment. DNase and  
33 RNase were purchased from Beijing Solarbio Science & Technology Co., Ltd. Other  
34 reagents were of analytical reagent grade and used without further purification or  
35 treatment.

36 All aqueous solutions were prepared with ultrapure water obtained by a Milli-Q  
37 water purification system (18.2 MΩ cm). Hela cells, HepG2 cells, HUVEC cells and  
38 human serum were obtained from the Life Sciences College of Jilin University (Jilin,  
39 China).

### 40 **Synthesis**

41 The synthetic route of BEB-A is shown below. Compounds 1 and 2 were  
42 synthesized according to the previously published methods.<sup>1,2</sup>

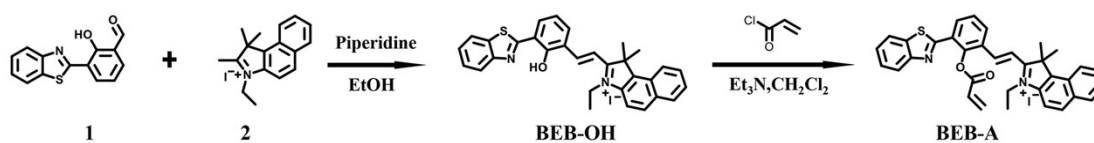

44 **Scheme S1** The synthesis and the characterization of BEB-A

45

46 **Synthesis of BEB-OH.** Compound 1 (250 mg, 0.98 mmol) and compound 2 (365  
47 mg, 0.98 mmol) were dissolved in ethanol (30 mL) and 3.98 mmol of piperidine was  
48 then slowly added. The mixture was stirred at 80°C for 12 h. After cooling down to  
49 room temperature, the mixture was concentrated under reduced pressure. The obtained  
50 crude product was purified by silica gel chromatography using CH<sub>2</sub>Cl<sub>2</sub>/CH<sub>3</sub>OH (100/1  
51 to 30/1, v/v) as the eluent, from which the target blue solid (136 mg) product was  
52 obtained. <sup>1</sup>H NMR (500 MHz, DMSO-*d*<sub>6</sub>) 1H NMR (500 MHz, DMSO) δ 8.82 (s, 1H),  
53 8.48 (d, J = 13.0 Hz, 1H), 8.27 (t, J = 11.1 Hz, 1H), 8.22 (s, 1H), 8.11 (dd, J = 16.0, 8.5  
54 Hz, 2H), 8.05 (d, J = 7.8 Hz, 1H), 7.95 (d, J = 8.0 Hz, 1H), 7.81 (d, J = 8.8 Hz, 1H),  
55 7.70 (t, J = 7.3 Hz, 1H), 7.55 (t, J = 7.4 Hz, 1H), 7.51 – 7.43 (m, 1H), 7.34 (t, J = 7.4  
56 Hz, 1H), 6.90 (d, J = 14.8 Hz, 1H), 6.57 (d, J = 9.0 Hz, 1H), 4.48 (d, J = 6.9 Hz, 2H),  
57 2.02 (s, 6H), 1.40 (t, J = 6.6 Hz, 3H). <sup>13</sup>C NMR (126 MHz, DMSO-*d*<sub>6</sub>) δ 179.59, 176.44,  
58 164.00, 152.59, 152.07, 139.53, 136.19, 134.69, 132.07, 131.59, 130.84, 130.40,  
59 128.31, 128.10, 126.07, 125.62, 124.02, 122.99, 122.17, 122.17, 121.56, 119.68,  
60 112.15, 99.33, 51.71, 27.13, 13.29, 0.58. MS (MALDI-TOF-MS, m/z) Calcd for  
61 [C<sub>31</sub>H<sub>27</sub>N<sub>2</sub>OS]<sup>+</sup>: 475.1839, found: 475.1840.

## 62 Theoretical Calculation and Analysis

63 Calculations of optimal geometry and electronic structure of the probes were  
64 carried out by density functional theory (DFT) and time-dependent DFT (TDDFT) at

65 the CAM-B3LYP/6-31G(d) level using Gaussian 16 software.<sup>3</sup> The obtained data were  
66 further analyzed by Multiwfn 3.7 software.<sup>4</sup>

## 67 **Cell Culture**

68 HeLa (cervical cancer), HepG2 (liver cancer), HUVEC (human umbilical vein  
69 endothelial) cells were cultured in a Dulbecco's modified Eagle's medium (DMEM)  
70 supplemented with 10% fetal bovine serum at 37 °C and in a 5% CO<sub>2</sub> atmosphere. The  
71 cells were then plated on a 35-mm culture dish and allowed to attach for 24 h.

## 72 **Cytotoxicity Assay**

73 Cell cytotoxicity was evaluated using CCK-8 assay. Cells were cultivated in a 96-  
74 well plate until 50–70% confluence and then incubated with different concentrations of  
75 probe for 10 h; after that, they were subjected to CCK-8 assay (n = 5). Cells treated  
76 with CMEM (control; n=5) were also prepared in parallel under the same conditions.

## 77 **Fluorescence Imaging**

78 Fluorescence imaging experiments were carried out using cells treated with four  
79 different conditions: (1) cells were incubated with PBS only; (2) cells were incubated  
80 with the probe BEB-A (5 μM) at 37°C for 10 min; (3) cells were treated with NEM (a  
81 sulfhydryl-containing trapping agent; 1 mM) for 20 min, followed by BEB-A (5 μM)  
82 for another 3 min. Following incubation, the cells were subjected to fluorescence  
83 imaging using a confocal laser scanning microscope at an excitation wavelength of 543  
84 nm (a laser diode) and emission wavelengths between 580 and 730 nm.

## 85 **Co-staining Experiments**

86 **Co-staining of Mitochondria:** HeLa cells were first treated with MitoTracker  
87 Green FM (200 nM) for 30 min and were then rinsed twice with PBS buffer.  
88 Subsequently, the cells were treated with BEB-A (5 μM) for 3 min.

89 **Co-staining of Nucleus:** HeLa cells were first treated with DAPI for 30 min and

90 then rinsed twice with PBS buffer. After that, the cells were treated with BEB-A (5  $\mu$ M)  
91 for 3 min.

92 **DNase and RNase Digestion Experiments.** Cells were fixed in prechilled  
93 methanol at  $-20$  °C for 1 min. After that, the cells were permeabilized with 1% Triton  
94 X-100 in PBS solution for 2 min at room temperature. After rinsing twice with PBS,  
95 the cells were incubated with 5  $\mu$ M BEB-A dissolved in PBS/CH<sub>3</sub>CN (v/v=8:2, pH 7.4)  
96 for 20 min at 37 °C under a 5% CO<sub>2</sub> atmosphere. Subsequently, the cells were washed  
97 twice with PBS buffer and were thereafter treated with DNase I (100 U/mL), RNase A  
98 (20  $\mu$ g/mL), or PBS buffer at 37 °C under a 5% CO<sub>2</sub> atmosphere for 3 h. Before  
99 imaging, the cells were rinsed twice with PBS buffer.

100 **Theoretical Calculations of the interactions between BEB-OH and RNA** The  
101 molecular docking was carried out using a crystal structure of RNA (PDB ID: 1ASY)  
102 on AutoDock 4.0 software. In the calculation of Gasteiger charge, the BEB-OH was set  
103 as AD4 atomic mode, and all rotating keys were set to have twisting force. The docking  
104 cycles and the parameters between ligand and RNA were set according to the default  
105 values. PyMOL software was used to display the docking model.

106 **Figures**

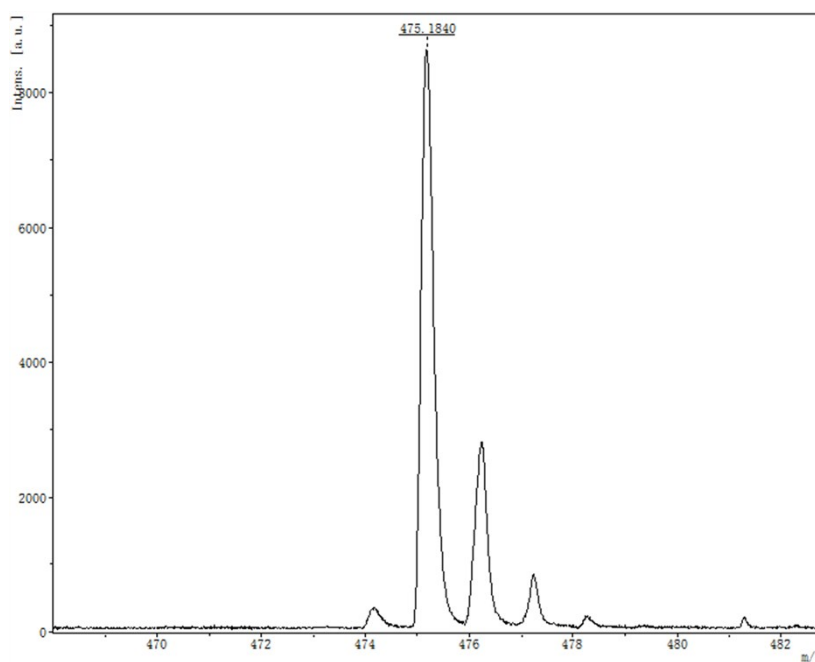

107

108

**Figure S1** MALDI-TOF-MS spectrum of BEB-OH.

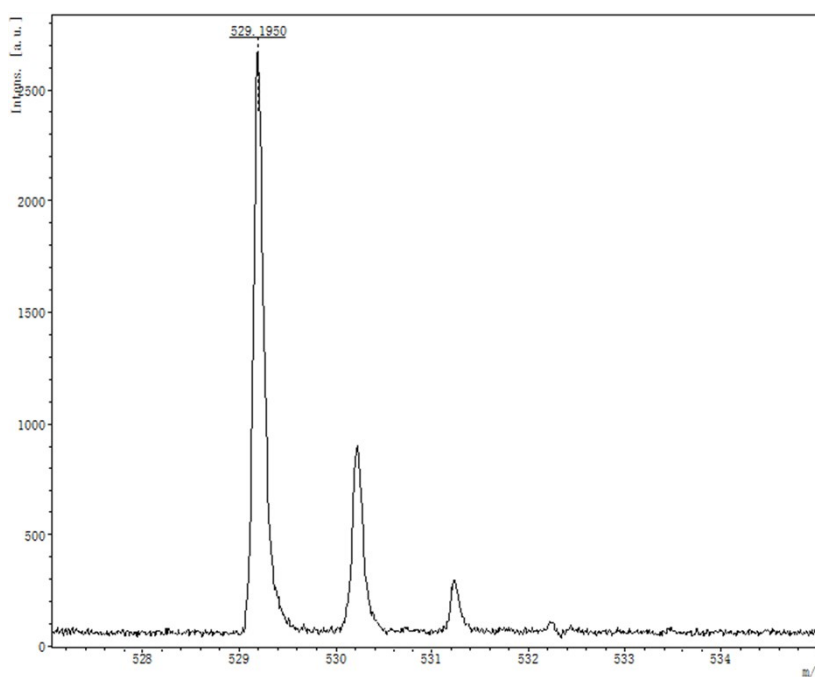

109

110

**Figure S2** MALDI-TOF-MS spectrum of BEB-A.

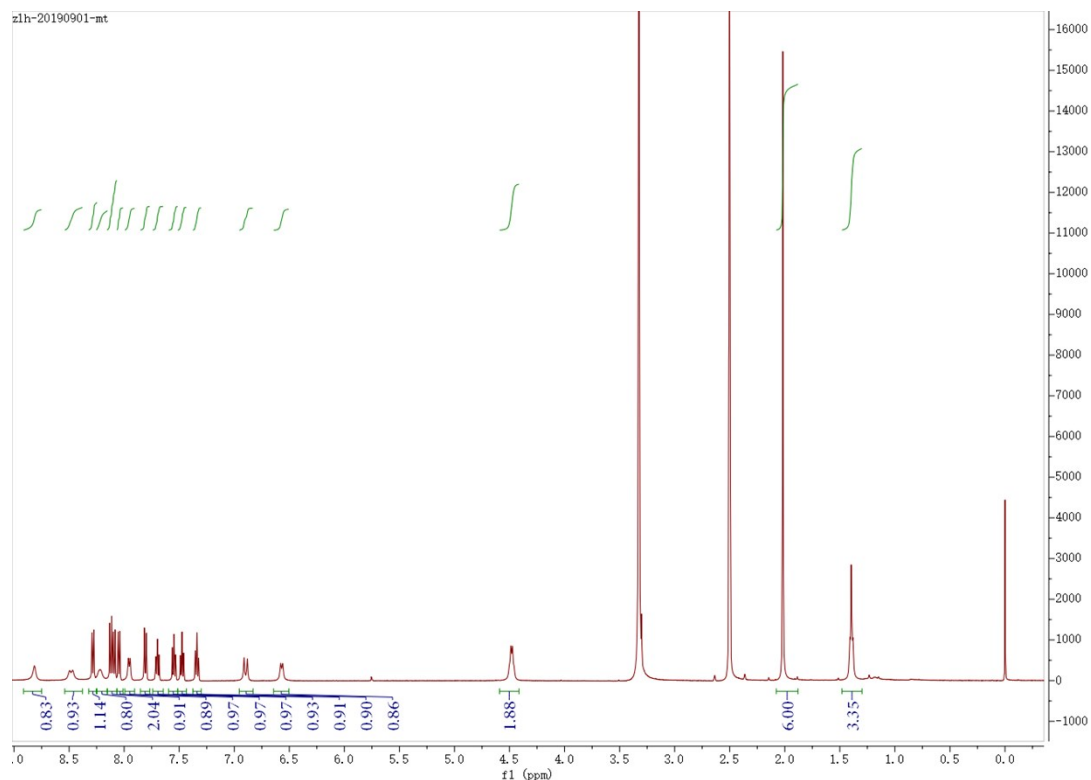

111  
112

Figure S3  $^1\text{H-NMR}$  spectrum of BEB-OH in  $\text{DMSO-}d_6$ .

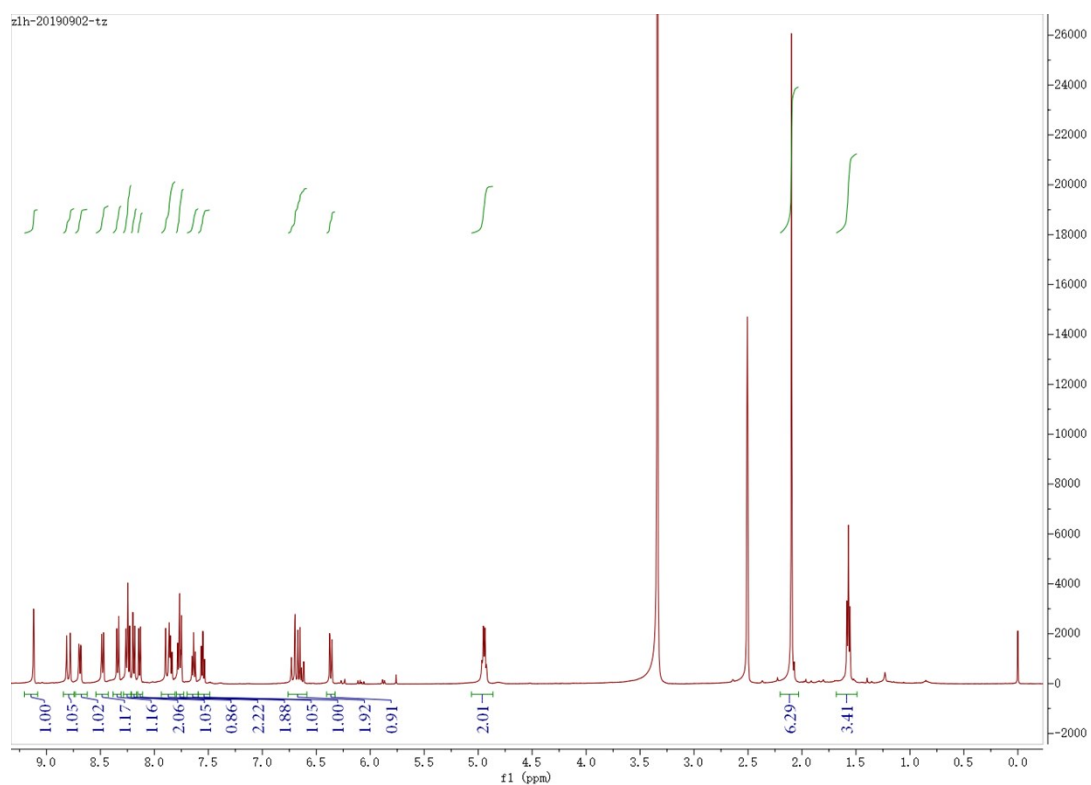

113

114

Figure S4  $^1\text{H-NMR}$  spectrum of BEB-A in  $\text{DMSO-}d_6$ .

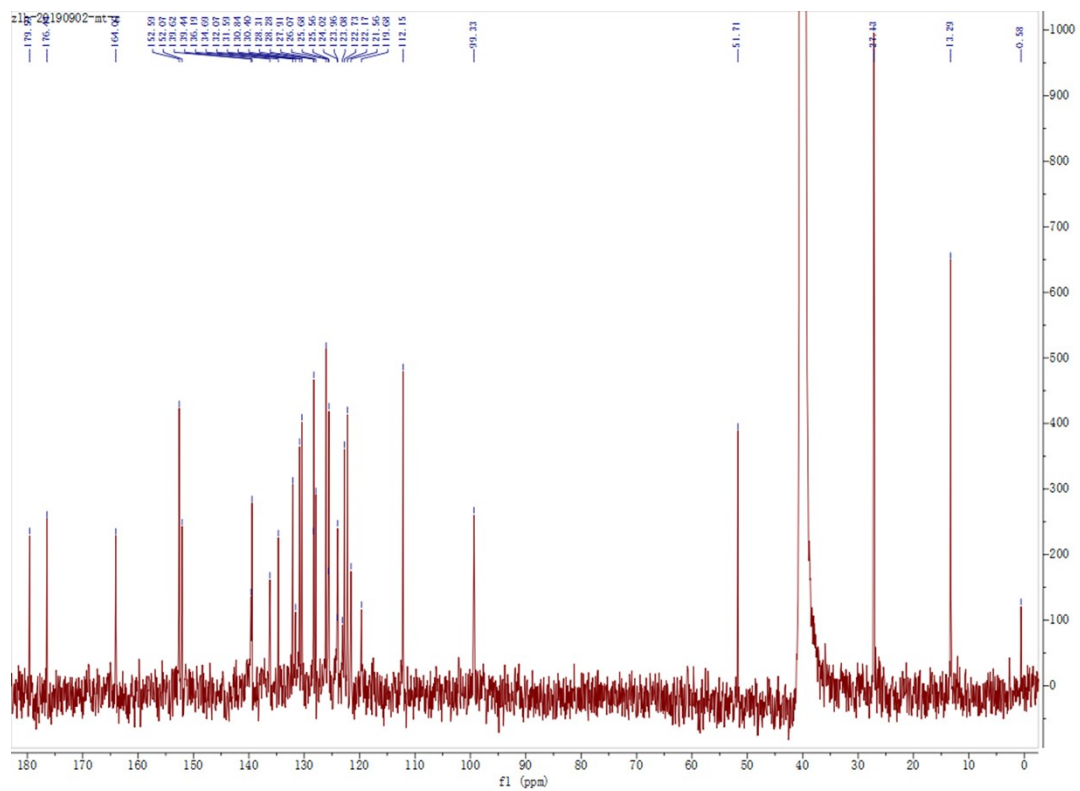

116 **Figure S5**  $^{13}\text{C}$ -NMR spectrum of BEB-OH in  $\text{DMSO-}d_6$ .

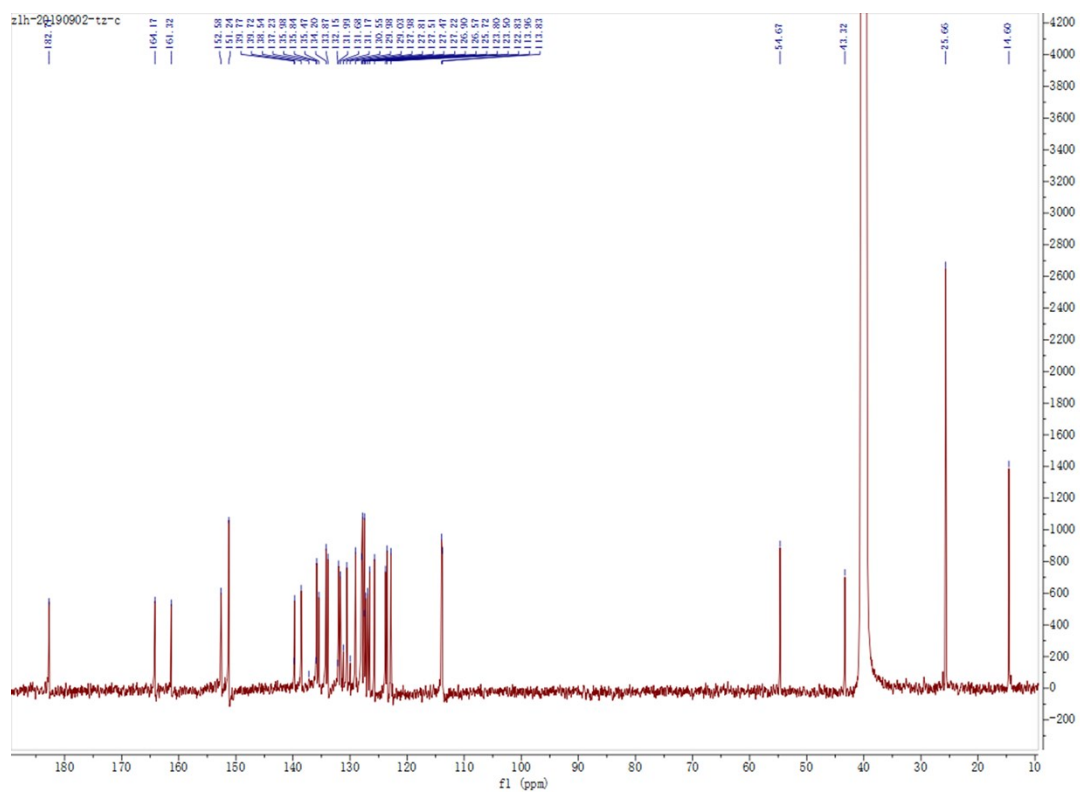

118 **Figure S6**  $^{13}\text{C}$ -NMR spectrum of BEB-A in  $\text{DMSO-}d_6$ .

119



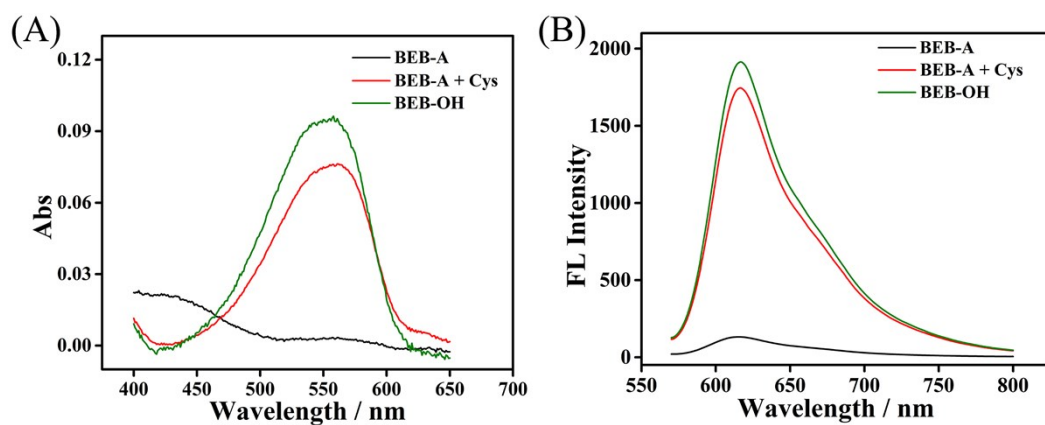

120

121 **Figure S7** (A) Absorption spectra of BEB-A (5  $\mu$ M), BEB-A with Cys (10  $\mu$ M) and BEB-OH

122 (5  $\mu$ M) in PBS/CH<sub>3</sub>CN (v/v=8:2, pH 7.4). (B) Fluorescence spectra of BEB-A (5  $\mu$ M), BEB-A with

123 Cys (10  $\mu$ M) and BEB-OH (5  $\mu$ M) in PBS/CH<sub>3</sub>CN (v/v=8:2, pH 7.4).

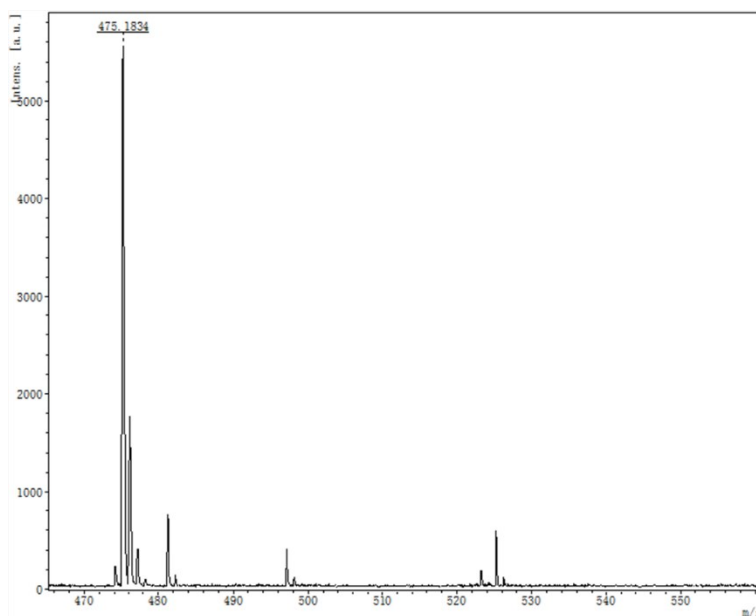

124

125 **Figure S8** MALDI-TOF-MS spectrum of BEB-A treated with Cys (30  $\mu$ M).

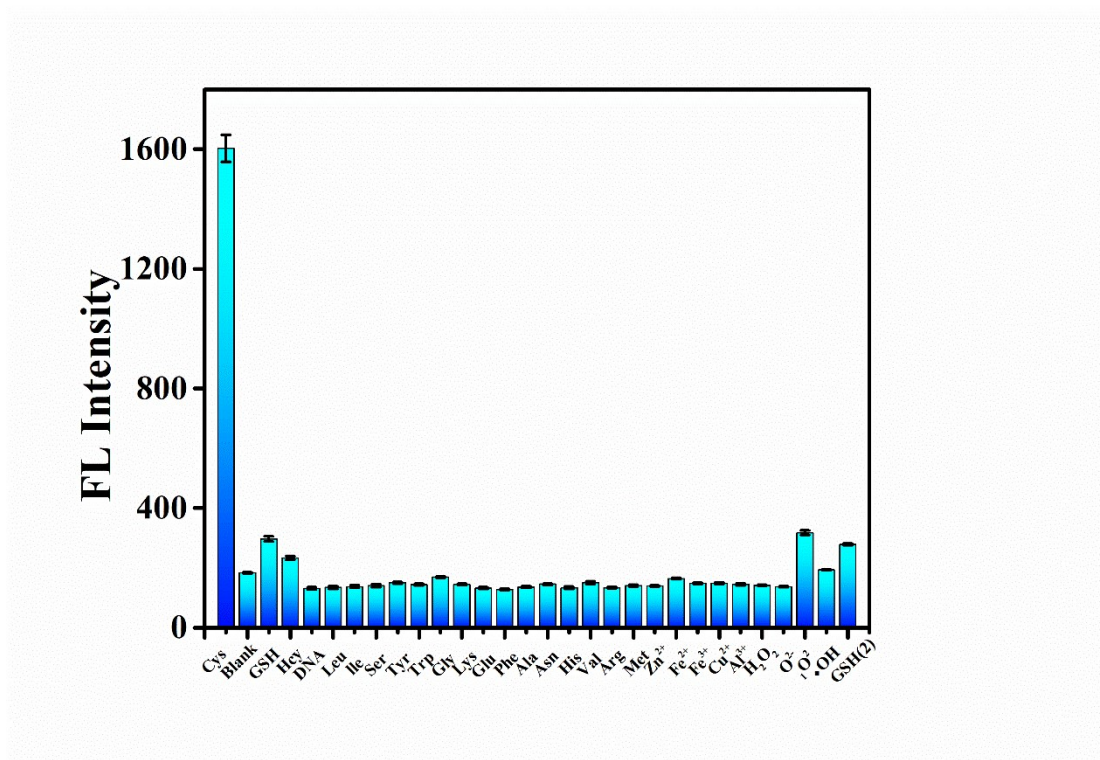

126

127 **Figure S9** Fluorescence intensity of BEB-A (5  $\mu\text{M}$ ) in PBS/CH<sub>3</sub>CN (v/v=8:2, pH 7.4) to  
 128 various analytes . Each spectra were recorded at 10 min after addition of the analytes (Cys(10  $\mu\text{M}$ ),  
 129 GSH(10  $\mu\text{M}$ ), Hcy(10  $\mu\text{M}$ ), Leu(10  $\mu\text{M}$ ), Ile(10  $\mu\text{M}$ ), Ser(10  $\mu\text{M}$ ), Tyr(10  $\mu\text{M}$ ), Trp(10  $\mu\text{M}$ ), Gly(10  
 130  $\mu\text{M}$ ), Lys(10  $\mu\text{M}$ ), Glu(10  $\mu\text{M}$ ), Phe(10  $\mu\text{M}$ ), Ala(10  $\mu\text{M}$ ), Asn(10  $\mu\text{M}$ ), His(10  $\mu\text{M}$ ), Val(10  $\mu\text{M}$ ),  
 131 Arg(10  $\mu\text{M}$ ), Met(10  $\mu\text{M}$ ), Zn<sup>2+</sup>(10  $\mu\text{M}$ ), Fe<sup>2+</sup>(10  $\mu\text{M}$ ), Fe<sup>3+</sup>(10  $\mu\text{M}$ ), Cu<sup>2+</sup>(10  $\mu\text{M}$ ), Al<sup>3+</sup>(10  $\mu\text{M}$ ),  
 132 H<sub>2</sub>O<sub>2</sub>(50  $\mu\text{M}$ ), O<sup>2-</sup>(50  $\mu\text{M}$ ), <sup>1</sup>O<sub>2</sub>(50  $\mu\text{M}$ ), ·OH(50  $\mu\text{M}$ ), GSH(2)(100 $\mu\text{M}$ ).

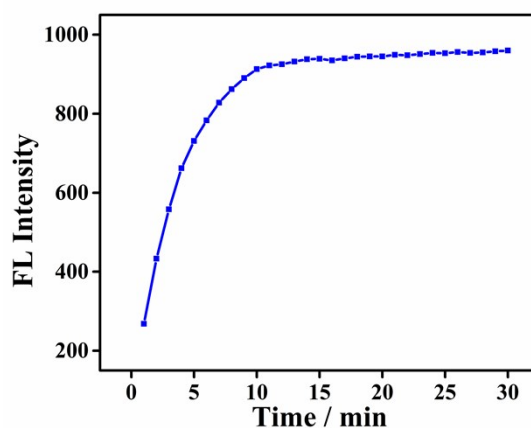

133

134 **Figure S10** Time-dependent fluorescence intensity changes of BEB-A upon addition of Cys  
 135 in PBS/CH<sub>3</sub>CN (v/v=8:2, pH 7.4).

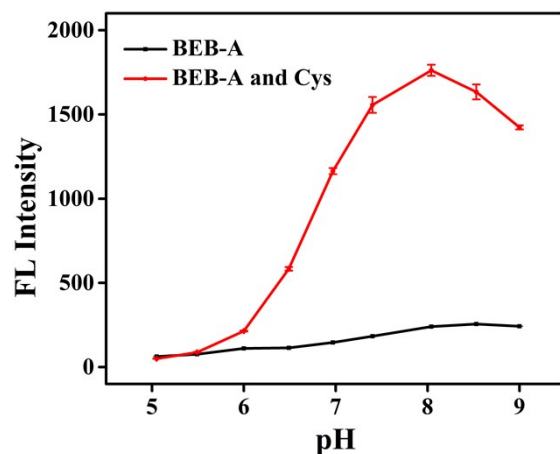

136

137 **Figure S11** Fluorescence intensity of BEB-A and BEB-A (5  $\mu\text{M}$ ) with Cys (10  $\mu\text{M}$ ) in 10  
 138 min at various pH values, respectively,  $\lambda_{\text{ex}} = 550 \text{ nm}$ ,  $\lambda_{\text{em}} = 616 \text{ nm}$  in PBS/ $\text{CH}_3\text{CN}$  (v/v=8:2).

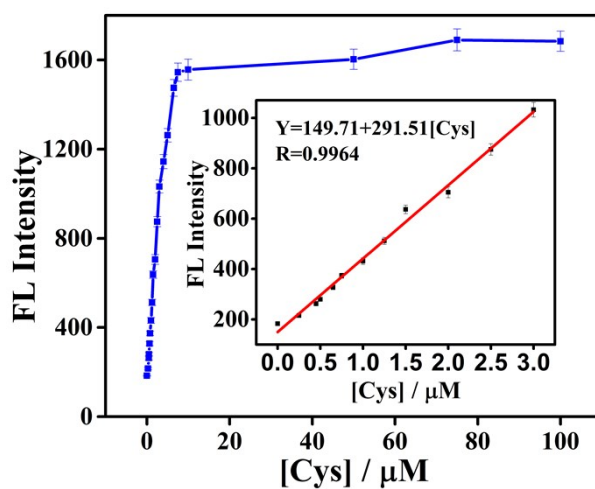

139

140 **Figure S12** Fluorescence intensity of BEB-A (5  $\mu\text{M}$ ) in the presence of various concentrations  
 141 of Cys in PBS/ $\text{CH}_3\text{CN}$  (v/v=8:2, pH 7.4).

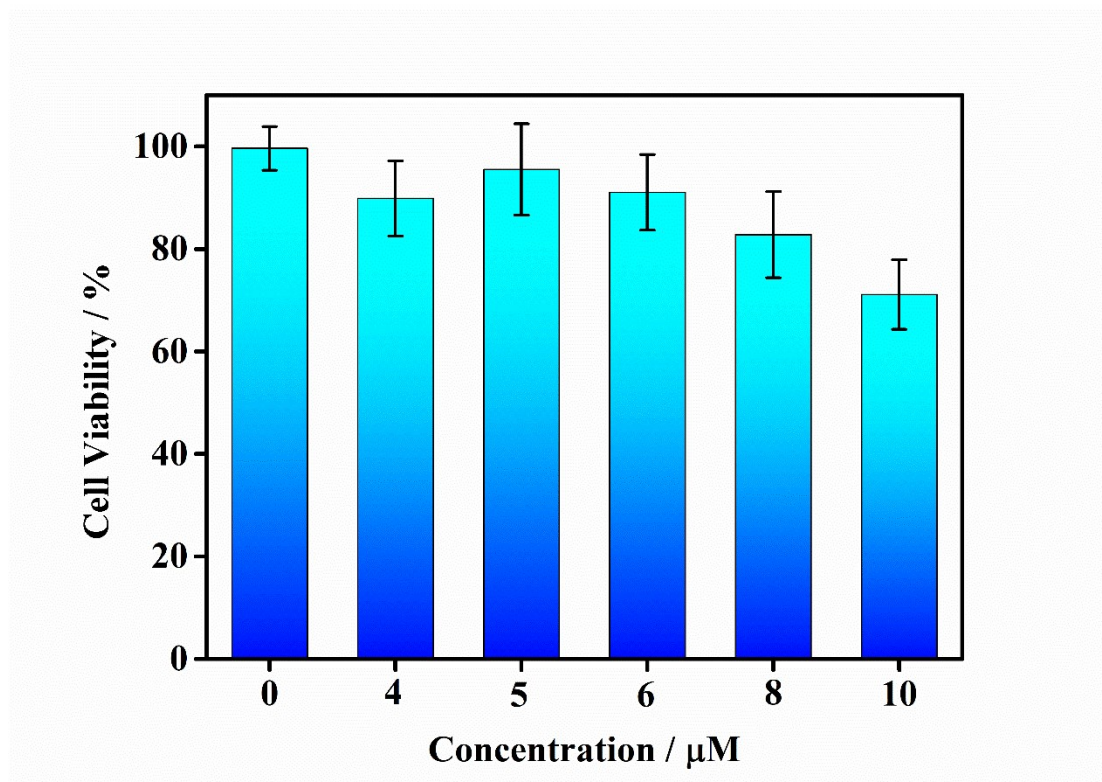

142

143 **Figure S13** CCK8 assay for the survival rate of HeLa cells treated with various concentrations  
 144 of BEB-A for 24 h.

145 **Tables**

146 **Table S1** Comparison of the present method with other reported Cys selective  
 147 fluorescence probe.

| Probe structure | Reaction medium                                 | $\lambda_{\text{ex}}/\lambda_{\text{em}}$<br>(nm) | Time<br>(min) | LOD<br>(nM) | Apply                              | Ref.      |
|-----------------|-------------------------------------------------|---------------------------------------------------|---------------|-------------|------------------------------------|-----------|
|                 | PBS/CH <sub>3</sub> CN<br>(v/v=8.5:1.5, pH 7.4) | 550/616                                           | 10            | 27          | Cys detection<br>Nucleolus imaging | This work |
|                 | PBS, pH 7.4                                     | 325/440                                           | 10            | 22          | Cys detection                      | 5         |
|                 | PBS/DMSO<br>(v/v=1:1, pH 7.4)                   | 425/620                                           | 3             | 91          | Cys detection                      | 6         |
|                 | PBS/EtOH<br>(v/v=1:1, pH 7.4)                   | 570/615                                           | 15            | 120         | Cys detection                      | 7         |
|                 | Tris-HCl, pH 7.4                                | 340/443                                           | 15            | 160         | Cys detection                      | 8         |

|                                                                                   |                               |         |    |      |                  |    |
|-----------------------------------------------------------------------------------|-------------------------------|---------|----|------|------------------|----|
| 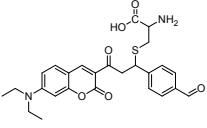 | PBS/DMSO<br>(v/v=1:1, pH 7.4) | 463/514 | 2  | 460  | Cys<br>detection | 9  |
|  | PBS/DMSO<br>(v/v=4:6, pH 7.4) | 342/470 | 10 | 1489 | Cys<br>detection | 10 |
|  | PBS/MeOH<br>(v/v=4:1, pH 7.4) | 417/489 | 30 | 2965 | Cys<br>detection | 11 |

148

149 **Table S2** Quantitative analysis of Cys in human serum samples (n = 5).

| Sample | Spiked ( $\mu\text{M}$ ) | Recovered ( $\mu\text{M}$ ) | Recovery (%) |
|--------|--------------------------|-----------------------------|--------------|
| A      | 2.00                     | 1.94 $\pm$ 0.07             | 96.9         |
|        | 3.00                     | 2.75 $\pm$ 0.05             | 91.8         |
| B      | 2.00                     | 1.96 $\pm$ 0.02             | 97.9         |
|        | 3.00                     | 2.67 $\pm$ 0.05             | 89.1         |

150

151 **References**

- 152 1. L. Zhao, X. He, Y. Huang, J. Li, Y. Li, S. Tao, Y. Sun, X. Wang, P. Ma and D.  
153 Song, *Sens. Actuators B Chem.*, 2019, **296**, 126571.
- 154 2. W. Xu, P. Ma, Q. Diao, L. Xu, X. Liu, Y. Sun, X. Wang and D. Song, *Sens.*  
155 *Actuators B Chem.*, 2017, **252**, 86-94.
- 156 3. M. J. Frisch, G. W. Trucks, H. B. Schlegel, G. E. Scuseria, M. A. Robb, J. R.  
157 Cheeseman, G. Scalmani, V. Barone and et al., Gaussian 16, Revision A.03,  
158 Gaussian Inc., Wallingford CT, 2016.
- 159 4. T. Lu and F. Chen, *J. Comput. Chem.*, 2012, **33**, 580-592.
- 160 5. L. Xia, Y. Zhao, J. Huang, Y. Gu and P. Wang, *Sens. Actuators B Chem.*, 2018,  
161 **270**, 312-317.
- 162 6. P. Wang, Q. Wang, J. Huang, N. Li and Y. Gu, *Biosensors Bioelectr.*, 2017, **92**,  
163 583-588.
- 164 7. S. Jiao, X. He, L. Xu, P. Ma, C. Liu, Y. Huang, Y. Sun, X. Wang and D. Song,  
165 *Sens. Actuators B Chem.*, 2019, **290**, 47-52.
- 166 8. Y. D. Zhang, X. Wang, X. Y. Bai, P. Li, D. Su, W. Zhang, W. Zhang and B.  
167 Tang, *Anal. Chem.*, 2019, **91**, 8591-8594.
- 168 9. Y. Yue, F. Huo, P. Ning, Y. Zhang, J. Chao, X. Meng and C. Yin, *J. Am. Chem.*  
169 *Soc.*, 2017, **139**, 3181-3185.
- 170 10. H. Song, J. Zhang, X. Wang, Y. Zhou, C. Xu, X. Pang and X. Peng, *Sens.*  
171 *Actuators B Chem.*, 2018, **259**, 233-240.
- 172 11. K. Xiong, F. Huo, J. Chao, Y. Zhang and C. Yin, *Anal. Chem.*, 2019, **91**, 1472-  
173 1478.
